# Supplementary material
Source: publisher site journal article supplement (https://www.dovepress.com/article/420662)
Supplement: Supplementary file 1 [file get_supplementary_file.php]

1

**Supplementary 1** International Classification of Diseases, ICD-10 disease groups

| <b>Mental Disorder</b>                                                                   | <b>ICD-10 code</b> |
|------------------------------------------------------------------------------------------|--------------------|
| Organic, including symptomatic mental disorders                                          | F00-F09            |
| Mental and behavioral disorders due to psychoactive substance abuse                      | F10-F19            |
| Schizophrenia, schizotypal, and delusional disorders                                     | F20-F29            |
| Mood (affective) disorders                                                               | F30-F39            |
| Neurotic, stress-related, and somatoform disorders                                       | F40-F48            |
| Behavioral syndromes associated with physiological disturbances and physical factors     | F50-F59            |
| Disorders of adult personality and behavior                                              | F60-F69            |
| Mental retardation                                                                       | F70-F79            |
| Disorders of psychological development                                                   | F80-F89            |
| Behavioral & emotional disorders with onset usually occurring in childhood & adolescence | F90-F98            |
| Unspecified mental disorders                                                             | F 99               |

2
